# Supplementary material
Source: publisher site journal article supplement (https://www.dovepress.com/article/314373)
Supplement: Supplementary file 1 [file get_supplementary_file.php]

**Additional Files**

**Table S1.** 98 m6A-SNPs with eQTL signals.

| SNP ID | Chr | Position | m6A_ID | Gene | Confidence_level | Gene_region | Modification_function | Pvalue |
| --- | --- | --- | --- | --- | --- | --- | --- | --- |
| rs2037844 | 15 | 32773444 | RMVar_ID_993992 | FMN1 | Prediction:(Low) | 3'UTR | Functional Gain | 3.60E-08 |
| rs2957748 | 15 | 71983659 | RMVar_ID_587419 | MYO9A | m6A-Label-seq:(High) | intron | Functional Loss | 1.17E-04 |
| rs74864150 | 13 | 97179363 | RMVar_ID_967282 | LINC00456 | Prediction:(Low) | intron | Functional Gain | 1.91E-04 |
| rs3811436 | 1 | 45660208 | RMVar_ID_638299 | GPBP1L1 | m6A-REF-seq:(High) | 5'UTR | Functional Loss | 1.97E-04 |
| rs2717554 | 8 | 142764535 | RMVar_ID_1427843 | LYNX1-SLURP2,SLURP2 | Prediction:(Low) | 3'UTR,3'UTR | Functional Loss | 2.63E-04 |
| rs3761180 | 20 | 50278335 | RMVar_ID_1210434 | SMIM25 | Prediction:(Low) | exon | Functional Loss | 3.58E-04 |
| rs11240547 | 1 | 205663804 | RMVar_ID_757528 | - | m6A-Label-seq:(High) | Unknown | Functional Loss | 6.14E-04 |
| rs76078428 | 2 | 24821871 | RMVar_ID_1242893 | CENPO | Prediction:(Low) | 3'UTR | Functional Gain | 7.15E-04 |
| rs3754245 | 1 | 236523845 | RMVar_ID_1182324 | LGALS8-AS1 | Prediction:(Low) | exon | Functional Gain | 7.70E-04 |
| rs2236200 | 20 | 62410963 | RMVar_ID_1213053 | RBBP8NL | Prediction:(Low) | CDS | Functional Gain | 7.91E-04 |
| rs1536167 | 1 | 1305643 | RMVar_ID_1139499 | ACAP3 | Prediction:(Low) | exon | Functional Loss | 8.03E-04 |
| rs41269993 | 1 | 160998819 | RMVar_ID_1159570 | F11R,AL591806.4 | Prediction:(Low) | 3'UTR,3'UTR | Functional Gain | 9.12E-04 |
| rs55845289 | 7 | 142271263 | RMVar_ID_1398722 | AC245088.1 | Prediction:(Low) | exon | Functional Loss | 1.19E-03 |
| rs57018991 | 7 | 142271260 | RMVar_ID_1398721 | AC245088.1 | Prediction:(Low) | exon | Functional Loss | 1.19E-03 |
| rs1827125 | 8 | 46974490 | RMVar_ID_1436124 | MAPK6P4 | Prediction:(Low) | exon | Functional Loss | 1.26E-03 |
| rs79281411 | 15 | 72341223 | RMVar_ID_1006065 | HEXA,AC009690.1 | Prediction:(Low) | 3'UTR,intron | Functional Loss | 1.27E-03 |
| rs60571683 | 12 | 20916115 | RMVar_ID_945462 | SLCO1B3 | Prediction:(Low) | CDS | Functional Loss | 1.35E-03 |
| rs459552 | 5 | 112841059 | RMVar_ID_822319 | RF00017-2064 | MeRIP-seq:(Medium) | intron | Functional Loss | 1.38E-03 |
| rs2274264 | 1 | 1307088 | RMVar_ID_757532 | ACAP3 | MeRIP-seq:(Medium) | intron | Functional Loss | 1.43E-03 |
| rs2305474 | 7 | 158743643 | RMVar_ID_826085 | ESYT2 | miCLIP:(High) | CDS | Functional Loss | 1.51E-03 |
| rs6037052 | 20 | 25186124 | RMVar_ID_1203738 | AL035252.6 | Prediction:(Low) | exon | Functional Loss | 1.82E-03 |
| rs8113620 | 19 | 49403998 | RMVar_ID_301983 | - | m6A-Label-seq:(High) | Unknown | Functional Loss | 1.88E-03 |
| rs1047444 | 3 | 45918587 | RMVar_ID_792577 | - | MeRIP-seq:(Medium) | Unknown | Functional Loss | 1.99E-03 |
| rs79225383 | 2 | 219229250 | RMVar_ID_1255139 | ATG9A | Prediction:(Low) | intron | Functional Loss | 2.01E-03 |
| rs1538404 | 14 | 70640672 | RMVar_ID_326014 | - | m6A-Label-seq:(High) | Unknown | Functional Loss | 2.09E-03 |
| rs8100893 | 19 | 52842068 | RMVar_ID_768871 | ZNF468,ZNF28 | MeRIP-seq:(Medium) | CDS,intron | Functional Loss | 2.09E-03 |
| rs11668109 | 19 | 41357872 | RMVar_ID_769284 | TMEM91,AC011462.1 | m6A-Label-seq:(High) | intron,intron | Functional Loss | 2.37E-03 |
| rs3219489 | 1 | 45331833 | RMVar_ID_1189779 | MUTYH,AL451136.1 | Prediction:(Low) | intron,CDS | Functional Loss | 2.38E-03 |
| rs4145868 | 6 | 169649325 | RMVar_ID_809333 | WDR27,AL031315.1 | m6A-Label-seq:(High) | intron,intron | Functional Loss | 2.60E-03 |
| rs2295146 | 14 | 103733019 | RMVar_ID_801447 | ZFYVE21 | DART-seq:(High) | stop codon | Functional Loss | 2.64E-03 |
| rs7243837 | 18 | 10727806 | RMVar_ID_1087136 | KIAA0895LP1 | Prediction:(Low) | exon | Functional Gain | 2.67E-03 |
| rs657339 | 11 | 74497547 | RMVar_ID_862621 | - | MeRIP-seq:(Medium) | Unknown | Functional Loss | 2.80E-03 |
| rs7517 | 1 | 150623935 | RMVar_ID_1152154 | ENSA | Prediction:(Low) | intron | Functional Gain | 2.80E-03 |
| rs7894 | 10 | 131955978 | RMVar_ID_838441 | PPP2R2D | MeRIP-seq:(Medium) | 3'UTR | Functional Loss | 2.83E-03 |
| rs7275 | 19 | 11060163 | RMVar_ID_765052 | SMARCA4 | MeRIP-seq:(Medium) | CDS | Functional Loss | 2.96E-03 |
| rs17677890 | 16 | 72523344 | RMVar_ID_1040461 | LINC01572 | Prediction:(Low) | exon | Functional Gain | 3.06E-03 |
| rs868658 | 11 | 77209292 | RMVar_ID_925118 | MYO7A | Prediction:(Low) | intron | Functional Loss | 3.08E-03 |
| rs141503320 | 12 | 43739089 | RMVar_ID_949259 | AC093012.1 | Prediction:(Low) | exon | Functional Loss | 3.09E-03 |
| rs11634019 | 15 | 76342339 | RMVar_ID_775156 | - | m6A-Seal-seq&MeRIP-seq:(Medium) | Unknown | Functional Loss | 3.16E-03 |
| rs7249069 | 19 | 8333122 | RMVar_ID_422926 | KANK3 | MeRIP-seq:(Medium) | CDS | Functional Loss | 3.33E-03 |
| rs9268055 | 6 | 32262831 | RMVar_ID_1378490 | TSBP1-AS1 | Prediction:(Low) | intron | Functional Gain | 3.36E-03 |
| rs79030179 | 16 | 628907 | RMVar_ID_1016866 | RAB40C | Prediction:(Low) | 3'UTR | Functional Loss | 3.91E-03 |
| rs1063355 | 6 | 32659937 | RMVar_ID_803737 | HLA-DQB1 | MeRIP-seq:(Medium) | exon | Functional Loss | 4.10E-03 |
| rs10512187 | 9 | 87555970 | RMVar_ID_256392 | - | m6A-Label-seq:(High) | Unknown | Functional Loss | 4.23E-03 |
| rs827319 | 10 | 70922675 | RMVar_ID_401302 | - | m6A-Label-seq:(High) | Unknown | Functional Loss | 4.35E-03 |
| rs41435744 | 15 | 52551659 | RMVar_ID_651432 | ARPP19 | DART-seq:(High) | 3'UTR | Functional Loss | 4.52E-03 |
| rs75768489 | 2 | 130373257 | RMVar_ID_1236991 | PTPN18 | Prediction:(Low) | 3'UTR | Functional Gain | 4.76E-03 |
| rs10743938 | 12 | 11030852 | RMVar_ID_852968 | AC018630.2,PRH1,TAS2R14,TAS2R31 | MeRIP-seq:(Medium) | intron,intron,intron,CDS | Functional Loss | 4.81E-03 |
| rs2273719 | 9 | 27220068 | RMVar_ID_1458106 | TEK | Prediction:(Low) | CDS | Functional Loss | 4.88E-03 |
| rs3807066 | 6 | 169789924 | RMVar_ID_1375577 | LINC00242 | Prediction:(Low) | exon | Functional Gain | 4.96E-03 |
| rs6059681 | 20 | 34135535 | RMVar_ID_1205660 | AL031668.2 | Prediction:(Low) | exon | Functional Loss | 5.00E-03 |
| rs658176 | 8 | 60656877 | RMVar_ID_845947 | - | m6A-Label-seq:(High) | Unknown | Functional Loss | 5.10E-03 |
| rs1060394 | 1 | 224193219 | RMVar_ID_752779 | DEGS1 | DART-seq:(High) | 3'UTR | Functional Loss | 5.23E-03 |
| rs3198583 | 1 | 200971052 | RMVar_ID_1173171 | KIF21B | Prediction:(Low) | 3'UTR | Functional Loss | 5.35E-03 |
| rs11938375 | 4 | 75286250 | RMVar_ID_342527 | AC025244.1 | m6A-Label-seq:(High) | intron | Functional Loss | 5.48E-03 |
| rs3010858 | 1 | 221842588 | RMVar_ID_661869 | - | m6A-Label-seq:(High) | Unknown | Functional Loss | 5.49E-03 |
| rs178184 | 14 | 26509987 | RMVar_ID_684700 | NOVA1 | m6A-Label-seq:(High) | intron | Functional Loss | 5.51E-03 |
| rs4077410 | 16 | 29986879 | RMVar_ID_786639 | TAOK2 | MeRIP-seq:(Medium) | CDS | Functional Loss | 5.66E-03 |
| rs2257793 | 5 | 99432079 | RMVar_ID_254484 | - | m6A-Label-seq:(High) | Unknown | Functional Loss | 5.84E-03 |
| rs2236203 | 20 | 62402808 | RMVar_ID_1213023 | AL121832.3,CABLES2 | Prediction:(Low) | exon,intron | Functional Loss | 5.88E-03 |
| rs9661943 | 1 | 229126870 | RMVar_ID_469528 | LINC02814 | m6A-Label-seq:(High) | intron | Functional Loss | 5.98E-03 |
| rs17103237 | 14 | 35362605 | RMVar_ID_975757 | AL133163.2 | Prediction:(Low) | exon | Functional Gain | 5.99E-03 |
| rs2275443 | 10 | 58196280 | RMVar_ID_839721 | - | MeRIP-seq:(Medium) | Unknown | Functional Loss | 6.01E-03 |
| rs35786364 | 2 | 102957058 | RMVar_ID_318715 | TMEM182 | m6A-Label-seq:(High) | intron | Functional Loss | 6.11E-03 |
| rs2252861 | 5 | 135399818 | RMVar_ID_1339883 | MACROH2A1 | Prediction:(Low) | 5'UTR | Functional Loss | 6.12E-03 |
| rs6533370 | 4 | 108618415 | RMVar_ID_528592 | RPL34-AS1 | m6A-Label-seq:(High) | intron | Functional Loss | 6.48E-03 |
| rs12449631 | 17 | 41221663 | RMVar_ID_784241 | lnc-KRTAP9-7-5 | m6A-Label-seq:(High) | intron | Functional Loss | 6.52E-03 |
| rs2275689 | 1 | 236558360 | RMVar_ID_754298 | HEATR1 | miCLIP:(High) | CDS | Functional Loss | 6.54E-03 |
| rs2075643 | 14 | 50916714 | RMVar_ID_797557 | PYGL | miCLIP:(High) | CDS | Functional Loss | 6.56E-03 |
| rs12720320 | 19 | 10353998 | RMVar_ID_771103 | - | MeRIP-seq:(Medium) | Unknown | Functional Loss | 6.71E-03 |
| rs13132963 | 4 | 94298629 | RMVar_ID_1331928 | HPGDS | Prediction:(Low) | 3'UTR | Functional Gain | 6.83E-03 |
| rs142504481 | 2 | 27013163 | RMVar_ID_1243551 | MAPRE3-AS1 | Prediction:(Low) | intron | Functional Loss | 6.91E-03 |
| rs8192474 | 17 | 32488663 | RMVar_ID_783352 | - | MeRIP-seq:(Medium) | Unknown | Functional Loss | 6.91E-03 |
| rs3795467 | 1 | 246776211 | RMVar_ID_1183675 | KIF28P | Prediction:(Low) | exon | Functional Gain | 6.92E-03 |
| rs5970 | 4 | 186284147 | RMVar_ID_1324046 | F11 | Prediction:(Low) | CDS | Functional Gain | 7.01E-03 |
| rs9455613 | 6 | 168229839 | RMVar_ID_1375276 | AL606970.2 | Prediction:(Low) | exon | Functional Gain | 7.02E-03 |
| rs6570277 | 6 | 138757152 | RMVar_ID_806464 | CCDC28A-AS1 | m6A-Label-seq:(High) | intron | Functional Loss | 7.25E-03 |
| rs1115713 | 20 | 31548187 | RMVar_ID_718080 | HM13 | MeRIP-seq:(Medium) | intron | Functional Loss | 7.34E-03 |
| rs12928610 | 16 | 30004701 | RMVar_ID_785081 | INO80E | miCLIP:(High) | intron | Functional Loss | 7.44E-03 |
| rs35707 | 12 | 100579931 | RMVar_ID_932734 | GAS2L3,AC010200.1 | Prediction:(Low) | intron,exon | Functional Loss | 7.54E-03 |
| rs3761028 | 19 | 1085967 | RMVar_ID_771828 | ARHGAP45 | miCLIP:(High) | CDS | Functional Loss | 7.57E-03 |
| rs9405680 | 6 | 449281 | RMVar_ID_178152 | - | m6A-Label-seq:(High) | Unknown | Functional Loss | 8.32E-03 |
| rs12713444 | 2 | 61626266 | RMVar_ID_813967 | - | m6A-Label-seq:(High) | Unknown | Functional Loss | 8.48E-03 |
| rs3742000 | 12 | 111900735 | RMVar_ID_465288 | - | MeRIP-seq:(Medium) | Unknown | Functional Loss | 8.48E-03 |
| rs3027961 | 19 | 46775602 | RMVar_ID_299867 | FKRP | MeRIP-seq:(Medium) | intron | Functional Loss | 8.58E-03 |
| rs2270983 | 3 | 126023082 | RMVar_ID_1280657 | SLC41A3 | Prediction:(Low) | intron | Functional Loss | 8.60E-03 |
| rs1050115 | 2 | 135754247 | RMVar_ID_1238297 | UBXN4 | Prediction:(Low) | intron | Functional Loss | 8.68E-03 |
| rs35782901 | 5 | 148629028 | RMVar_ID_1344219 | HTR4 | Prediction:(Low) | intron | Functional Gain | 8.70E-03 |
| rs382571 | 17 | 43019464 | RMVar_ID_1066943 | VAT1 | Prediction:(Low) | intron | Functional Loss | 8.87E-03 |
| rs2076153 | 1 | 209780226 | RMVar_ID_1176942 | TRAF3IP3 | Prediction:(Low) | intron | Functional Gain | 8.90E-03 |
| rs62291986 | 3 | 186607679 | RMVar_ID_152586 | AC068631.1 | m6A-Label-seq:(High) | intron | Functional Loss | 9.10E-03 |
| rs41293907 | 6 | 31516115 | RMVar_ID_1377195 | AL663061.2 | Prediction:(Low) | exon | Functional Gain | 9.33E-03 |
| rs6433079 | 2 | 168640142 | RMVar_ID_813157 | CERS6 | m6A-Label-seq:(High) | intron | Functional Loss | 9.60E-03 |
| rs73501023 | 11 | 34081824 | RMVar_ID_679871 | CAPRIN1 | m6A-Label-seq:(High) | intron | Functional Loss | 9.62E-03 |
| rs529224 | 1 | 100352622 | RMVar_ID_637651 | CDC14A | MeRIP-seq:(Medium) | intron | Functional Loss | 9.84E-03 |
| rs11555011 | 16 | 68054582 | RMVar_ID_1038342 | DUS2 | Prediction:(Low) | CDS | Functional Gain | 9.89E-03 |
| rs658071 | 3 | 53475080 | RMVar_ID_1304378 | AC092035.1 | Prediction:(Low) | exon | Functional Gain | 9.93E-03 |
| rs6816786 | 4 | 44530007 | RMVar_ID_154775 | - | m6A-Label-seq:(High) | Unknown | Functional Loss | 9.93E-03 |
